# Supplementary material for: Regulatory Efficacy of the Polyunsaturated Fatty Acids from Microalgae Spirulina platensis on Lipid Metabolism and Gut Microbiota in High-Fat Diet Rats
Source: PubMed Central journal article supplement (PMC6213792; doi:10.3390/ijms19103075), 2018-10-09
Supplement: ijms-19-03075-s001.pdf [file ijms-19-03075-s001.pdf]

# Regulatory efficacy of the polyunsaturated fatty acids from microalgae *Spirulina platensis* on lipid metabolism and gut microbiota in high-fat diet rats

Tian-Tian Li<sup>a#</sup>, Yuanyuan Liu<sup>a#</sup>, Xu-Zhi Wan<sup>a</sup>, Zi-Rui Huang<sup>a</sup>, Bin Liu<sup>a\*</sup>, Chao Zhao<sup>a, b, c\*</sup>

<sup>a</sup> College of Food Science, Fujian Agriculture and Forestry University, Fuzhou 350002, China

<sup>b</sup> Fujian Province Key Laboratory for the Development of Bioactive Material from Marine Algae, Quanzhou Normal University, Quanzhou 362000, China

<sup>c</sup> Department of Chemistry, University of California, Davis 95616, USA

<sup>#</sup>Tian-tian Li and Yuanyuan Liu contributed equally to this study.

\*To whom correspondence should be addressed: No.15 Shangxiadian Rd., Fuzhou 350002, China; E-mail: binliu618@163.com (B. Liu), zhchao@live.cn (C. Zhao)

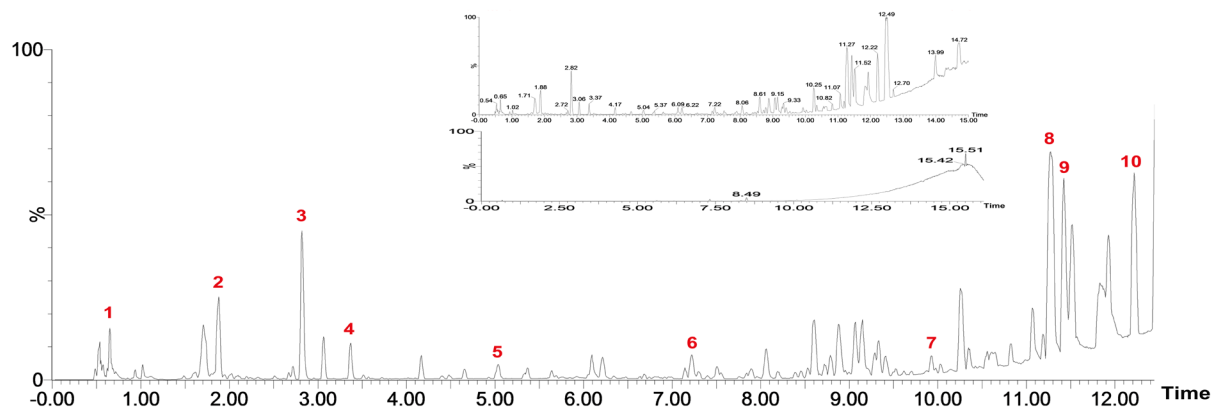

**Supplementary Figure S1.** Chromatographic peaks of *Spirulina platensis* ethanol extract in UPLC.

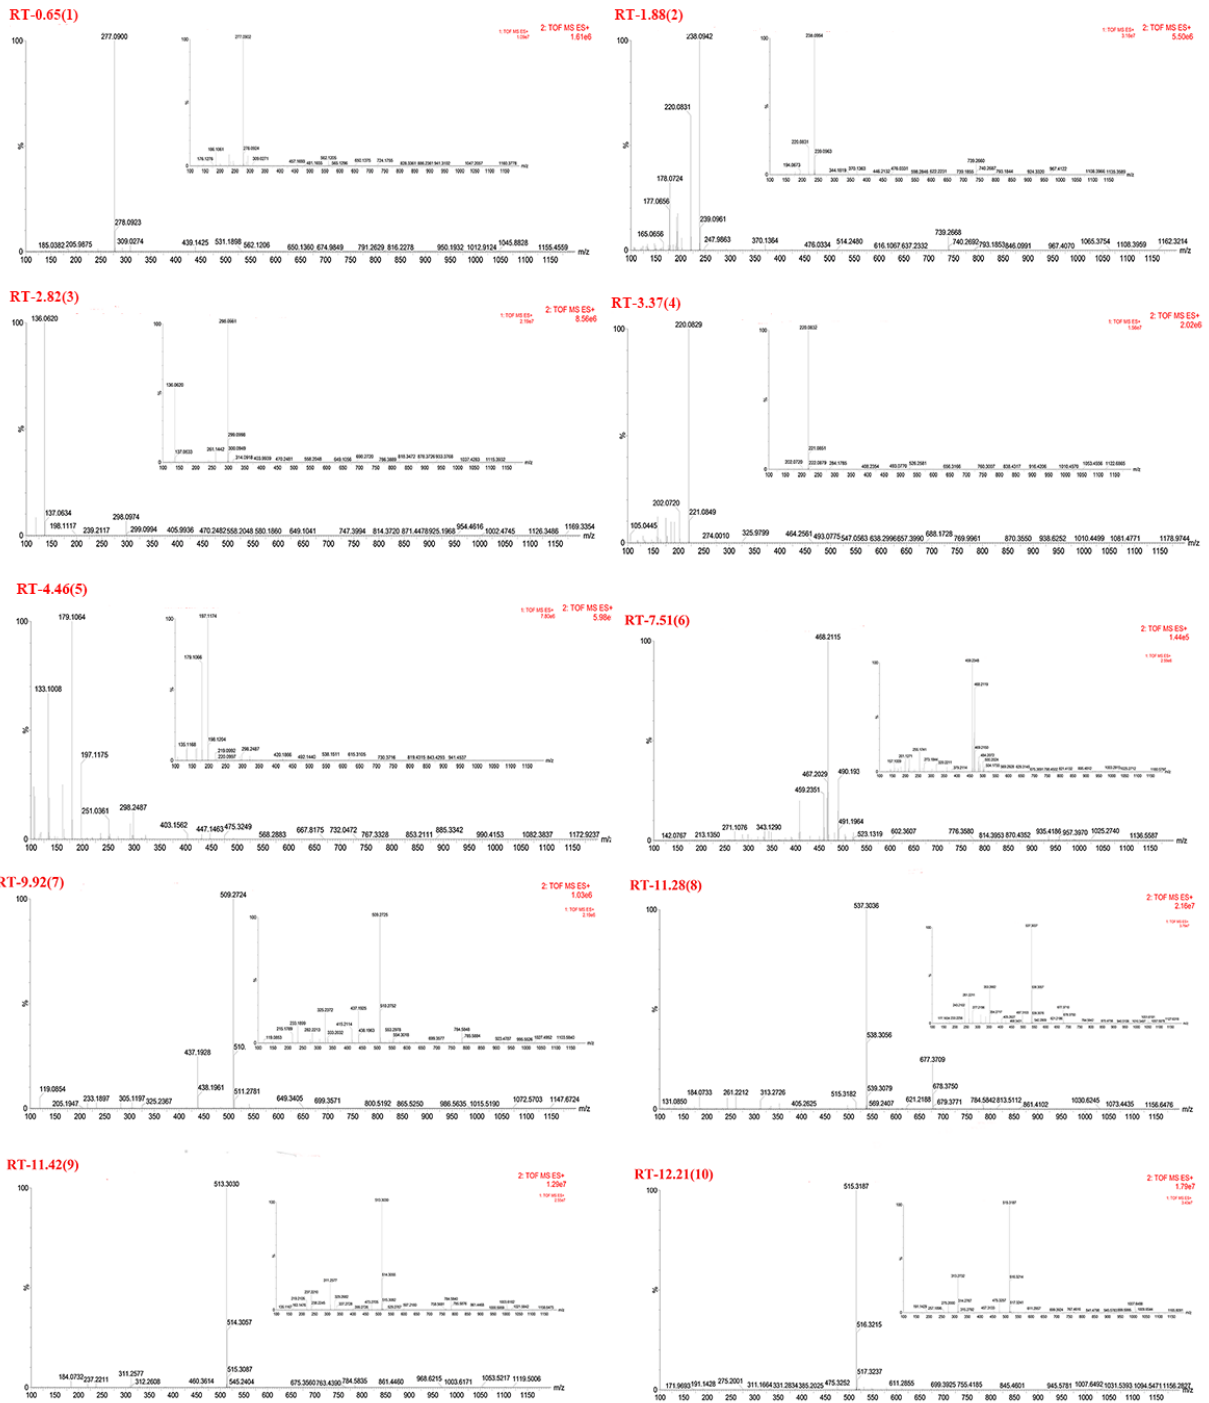

**Supplementary Figure S2.** Representative UPLC/Q-TOF MS chromatographs of ethanol extracts of *Spirulina platensis*.
